# Supplementary material
Source: publisher figshare collection journal article supplement (https://asha.figshare.com/articles/dataset/_/12462596)
Supplement: Supplementary file 1 [file 1]

**Supplemental Material S3.** Performance variables (summarized across all treated items).

| <b>Participant</b> | <b>Sessions</b> | <b>Trials</b> | <b>Minutes</b> | <b>Trials/<br/>Hour</b> | <b>Features*</b> | <b>Features*<br/>/Trial</b> |
|--------------------|-----------------|---------------|----------------|-------------------------|------------------|-----------------------------|
| <b>S1</b>          | 36              | 694           | 3884           | 10.72                   | 4987             | 7.19                        |
| <b>S2</b>          | 23              | 246           | 2122           | 8.63                    | 438              | 1.78                        |
| <b>S3</b>          | 37              | 411           | 2933           | 8.4                     | 3388             | 8.24                        |
| <b>S4</b>          | 30              | 369           | 2943           | 7.52                    | 1625             | 4.4                         |
| <b>S5</b>          | 28              | 274           | 2299           | 7.15                    | 1656             | 6.04                        |
| <b>S6</b>          | 30              | 344           | 3330           | 6.2                     | 2274             | 6.61                        |
| <b>S7</b>          | 32              | 347           | 4011           | 5.19                    | 1985             | 5.72                        |
| <b>S8</b>          | 30              | 541           | 3698           | 8.78                    | 4608             | 8.52                        |
| <b>S9</b>          | 32              | 522           | 3767           | 8.31                    | 3361             | 6.44                        |
| <b>S10</b>         | 28              | 258           | 2927           | 5.29                    | 834              | 3.23                        |
| <b>S11</b>         | 28              | 443           | 2990           | 8.9                     | 4365             | 9.85                        |
| <b>S12</b>         | 29              | 320           | 2915           | 6.59                    | 2346             | 7.33                        |
| <b>S13</b>         | 29              | 333           | 2837           | 7.04                    | 2376             | 7.14                        |
| <b>S14</b>         | 28              | 511           | 3524           | 8.7                     | 2851             | 5.06                        |
| <b>S15</b>         | 28              | 703           | 3045           | 13.85                   | 6190             | 8.81                        |
| <b>S16</b>         | 26              | 670           | 3045           | 13.2                    | 6609             | 9.86                        |
| <b>S17</b>         | 31              | 854           | 3585           | 14.29                   | 8531             | 9.98                        |
| <b>S18</b>         | 27              | 446           | 3014           | 8.88                    | 3104             | 6.96                        |
| <b>S19</b>         | 30              | 1044          | 2770           | 22.61                   | 9492             | 9.09                        |
| <b>S20</b>         | 32              | 420           | 3188           | 7.9                     | 2354             | 5.60                        |
| <b>S21</b>         | 26              | 437           | 2795           | 9.38                    | 4008             | 9.17                        |
| <b>S22</b>         | 26              | 457           | 2835           | 9.67                    | 4305             | 9.42                        |
| <b>S23</b>         | 28              | 714           | 3015           | 14.21                   | 7472             | 10.46                       |
| <b>S24</b>         | 30              | 665           | 2970           | 13.43                   | 6791             | 10.21                       |
| <b>S25</b>         | 29              | 770           | 2840           | 16.27                   | 7205             | 9.36                        |
| <b>S26</b>         | 29              | 546           | 2910           | 11.26                   | 4728             | 8.66                        |
| <b>S27</b>         | 25              | 650           | 2970           | 13.13                   | 5399             | 8.31                        |

|            |    |      |      |       |       |       |
|------------|----|------|------|-------|-------|-------|
| <b>S28</b> | 27 | 1029 | 3305 | 18.68 | 10467 | 10.17 |
| <b>S29</b> | 30 | 393  | 2681 | 8.79  | 3513  | 8.94  |
| <b>S30</b> | 30 | 603  | 3145 | 11.5  | 4347  | 7.21  |
| <b>S31</b> | 30 | 594  | 3215 | 11.08 | 4852  | 8.17  |
| <b>S32</b> | 27 | 729  | 2767 | 15.81 | 7198  | 9.87  |
| <b>S33</b> | 29 | 797  | 2947 | 16.22 | 6652  | 8.35  |
| <b>S34</b> | 26 | 540  | 3042 | 10.65 | 3833  | 7.1   |
| <b>S35</b> | 31 | 847  | 3486 | 14.58 | 7322  | 8.64  |
| <b>S36</b> | 28 | 1302 | 3188 | 24.5  | 12949 | 9.95  |
| <b>S37</b> | 26 | 324  | 3130 | 6.21  | 2983  | 9.21  |
| <b>S38</b> | 28 | 1366 | 2987 | 27.44 | 13676 | 10.01 |
| <b>S39</b> | 26 | 741  | 2906 | 15.29 | 7683  | 10.37 |
| <b>S40</b> | 27 | 629  | 2592 | 4.12  | 5600  | 8.99  |
| <b>S41</b> | 31 | 1293 | 3424 | 2.64  | 13764 | 10.65 |
| <b>S42</b> | 20 | 269  | 2786 | 10.35 | 280   | 1.04  |
| <b>S43</b> | 32 | 666  | 3440 | 5.16  | 4618  | 6.93  |
| <b>S44</b> | 29 | 761  | 3003 | 3.94  | 6832  | 8.98  |

\*Features = participant-generated features
