# Supplementary material
Source: publisher figshare collection journal article supplement (https://asha.figshare.com/articles/dataset/_/12462596)
Supplement: Supplementary file 2 [file 1]

**Supplemental Material S1. Participant demographics.**

| <b>Participant</b> | <b>Age (years)</b> | <b>Race<sup>2</sup></b> | <b>Gender<sup>3</sup></b> | <b>Education (years)</b> | <b>Etiology</b>                    | <b>MPO<sup>5</sup></b> | <b>CAT Mean Modality T<sup>6</sup></b> |
|--------------------|--------------------|-------------------------|---------------------------|--------------------------|------------------------------------|------------------------|----------------------------------------|
| <b>S1</b>          | 42                 | AA, NA                  | M                         | 15                       | ischemic LH CVA w/ HC <sup>4</sup> | 55                     | 53.67                                  |
| <b>S2</b>          | 77                 | C                       | M                         | 12                       | ischemic LH CVA                    | 33                     | 46.83                                  |
| <b>S3</b>          | 62                 | C                       | M                         | 23                       | ischemic LH CVA                    | 89                     | 50                                     |
| <b>S4</b>          | 51                 | C                       | M                         | 13                       | ischemic LH CVA w/ HC              | 75                     | 46.33                                  |
| <b>S5</b>          | 68                 | C                       | F                         | 12                       | ischemic LH CVA                    | 199                    | 47.5                                   |
| <b>S6</b>          | 66                 | C                       | M                         | 18                       | ischemic LH CVA                    | 86                     | 64.17                                  |
| <b>S7</b>          | 52                 | C                       | M                         | 12                       | ischemic LH CVA                    | 10                     | 56                                     |
| <b>S8</b>          | 24                 | C                       | M                         | 16                       | LH cerebral aneurysm               | 10                     | 58                                     |
| <b>S9</b>          | 78                 | H                       | M                         | 25                       | ischemic LH CVA                    | 16                     | 52.5                                   |
| <b>S10</b>         | 64                 | C                       | M                         | 11                       | ischemic LH CVA w/ HC              | 84                     | 47.5                                   |
| <b>S11</b>         | 45                 | AA                      | M                         | 12                       | ischemic LH CVA                    | 120                    | 49.83                                  |
| <b>S12</b>         | 72                 | C                       | M                         | 14                       | ischemic LH CVA                    | 93                     | 50.83                                  |
| <b>S13</b>         | 51                 | AA                      | M                         | 16                       | ischemic LH CVA                    | 39                     | 51.33                                  |
| <b>S14</b>         | 75                 | C                       | M                         | 13                       | ischemic LH CVA                    | 14                     | 47.83                                  |
| <b>S15</b>         | 70                 | C                       | M                         | 14                       | ischemic LH CVA                    | 172                    | 50.16                                  |
| <b>S16</b>         | 48                 | C                       | M                         | 14                       | ischemic LH CVA                    | 8                      | 50.16                                  |
| <b>S17</b>         | 74                 | C                       | M                         | 20                       | ischemic LH CVA                    | 15                     | 52.83                                  |
| <b>S18</b>         | 67                 | C                       | F                         | 12                       | ischemic LH CVA w/ HC              | 8                      | 59                                     |
| <b>S19</b>         | 71                 | C                       | M                         | 16                       | ischemic LH CVA                    | 35                     | 54.83                                  |

|            |    |    |   |    |                       |     |       |
|------------|----|----|---|----|-----------------------|-----|-------|
| <b>S20</b> | 63 | C  | M | 14 | ischemic LH CVA       | 77  | 46.5  |
| <b>S21</b> | 62 | AA | M | 14 | hemorrhagic LH CVA    | 151 | 46.5  |
| <b>S22</b> | 63 | C  | M | 18 | ischemic LH CVA       | 74  | 48.67 |
| <b>S23</b> | 65 | C  | M | 20 | ischemic LH CVA       | 64  | 58.5  |
| <b>S24</b> | 57 | C  | F | 17 | ischemic LH CVA       | 102 | 56.33 |
| <b>S25</b> | 49 | C  | M | 12 | ischemic LH CVA       | 94  | 52.67 |
| <b>S26</b> | 68 | C  | M | 12 | ischemic LH CVA       | 161 | 49.16 |
| <b>S27</b> | 50 | C  | M | 12 | ischemic LH CVA       | 111 | 48.33 |
| <b>S28</b> | 71 | C  | F | 15 | ischemic LH CVA       | 114 | 51.5  |
| <b>S29</b> | 44 | AA | F | 15 | ischemic LH CVA       | 33  | 62    |
| <b>S30</b> | 59 | C  | M | 20 | ischemic LH CVA       | 25  | 52.83 |
| <b>S31</b> | 68 | C  | M | 18 | ischemic LH CVA       | 41  | 56.5  |
| <b>S32</b> | 73 | C  | M | 14 | ischemic LH CVA w/ HC | 18  | 53.5  |
| <b>S33</b> | 53 | C  | M | 14 | ischemic LH CVA       | 7   | 55.33 |
| <b>S34</b> | 61 | AA | M | 13 | ischemic LH CVA       | 245 | 47.83 |
| <b>S35</b> | 72 | C  | M | 16 | ischemic LH CVA       | 7   | 46.83 |
| <b>S36</b> | 68 | C  | M | 16 | ischemic LH CVA       | 59  | 52    |
| <b>S37</b> | 67 | C  | M | 14 | ischemic LH CVA       | 54  | 52    |
| <b>S38</b> | 70 | C  | M | 10 | ischemic LH CVA       | 18  | 58.83 |
| <b>S39</b> | 31 | C  | M | 14 | ischemic LH CVA       | 29  | 59.17 |
| <b>S40</b> | 68 | C  | M | 12 | ischemic LH CVA       | 14  | 52.83 |

|                                    |            |           |            |                 |                    |                |                 |
|------------------------------------|------------|-----------|------------|-----------------|--------------------|----------------|-----------------|
| <b>S41</b>                         | 69         | C         | M          | 12              | ischemic LH CVA    | 7              | 60.33           |
| <b>S42</b>                         | 76         | C         | M          | 16              | ischemic LH CVA    | 15             | 44.33           |
| <b>S43</b>                         | 71         | C         | M          | 12              | hemorrhagic LH CVA | 64             | 49.5            |
| <b>S44</b>                         | 54         | AA,<br>NA | M          | 16              | ischemic LH CVA    | 6              | 50              |
| <b>AVG (<i>SD</i><sup>1</sup>)</b> | 62<br>(12) |           | 5F,<br>39M | 14.86<br>(3.18) |                    | 62.5<br>(57.2) | 52.33<br>(4.72) |

<sup>1</sup>*SD* = Standard Deviation; <sup>2</sup>AA = African-American, NA = Native American, C = Caucasian, H = Hispanic; <sup>3</sup>M = Male, F = Female; <sup>4</sup>CVA = cerebrovascular accident; LH = left hemisphere, HC = hemorrhagic conversion; <sup>5</sup>MPO = months post onset; <sup>6</sup>CAT = Comprehensive Aphasia Test
